# Supplementary material
Source: publisher figshare collection journal article supplement (https://rs.figshare.com/ndownloader/files/14367038)
Supplement: Supplementary file 1 [file 14367038]

| **Resistance_drug_Classes** | **# genome with CRISPR-Cas and anti-CRISPR** |
| --- | --- |
| Aminoglycoside | 465 |
| Beta-lactam | 465 |
| Colistin | 467 |
| Fosfomycin | 464 |
| Fusidic Acid | 0 |
| Glycopeptid | 0 |
| Macrolide | 1 |
| Nitroimidazole | 1 |
| Oxazolidinone | 0 |
| Phenicol | 461 |
| Quinolone | 2 |
| Rifampicin | 3 |
| Sulphonamide | 57 |
| Tetracycline | 11 |
| Trimethoprim | 3 |
|  |  |
| **Point_mutation_genes** | **# genome with CRISPR-Cas and anti-CRISPR** |
| Efflux pump | 467 |
| Fluoroquinolone | 65 |
| Polymyxin | 465 |

Table S8: ARG_CRISPR-Cas_anti-CRISPR in *Pseudomonas aeruginosa*
